# Supplementary material for: Multifunctional Fe3O4/Au core/satellite nanocubes: an efficient chemical synthesis, characterization and functionalization of streptavidin protein
Source: Royal Society of Chemistry journal article supplement (doi:10.1039/c6dt04486g), 2017-01-01
Supplement: c6dt04486g1.pdf [file c6dt04486g1.pdf]

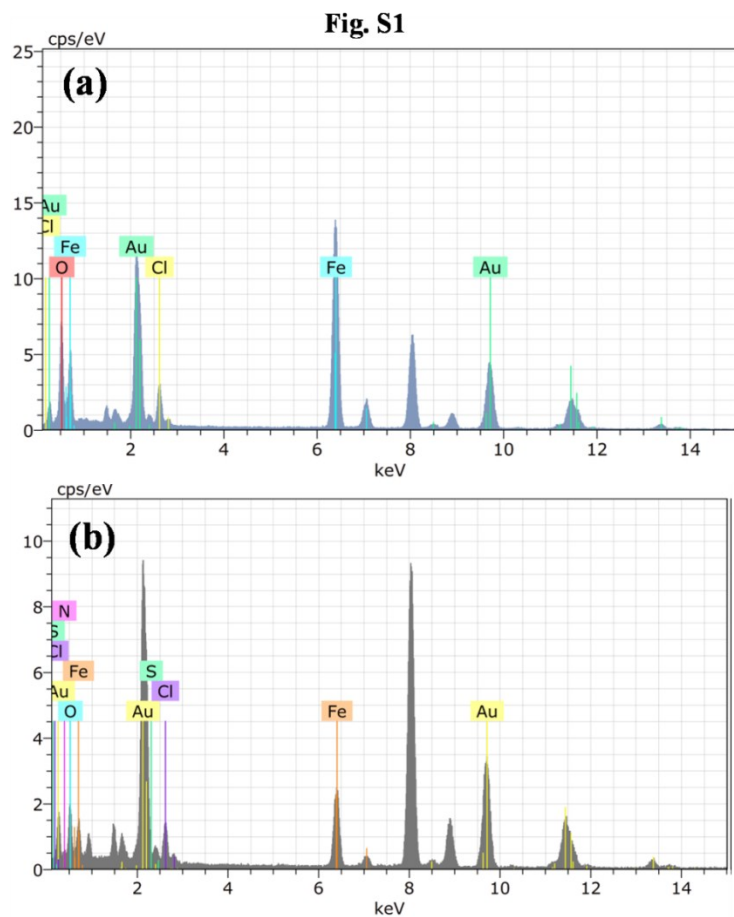

**Fig. S1** the EDS spectra for  $\text{Fe}_3\text{O}_4/\text{Au}$  core/satellite nanoparticles and streptavidin immobilized  $\text{Fe}_3\text{O}_4/\text{Au}$  core/satellite nanoparticles.
